# Supplementary material
Source: publisher site journal article supplement (https://www.spandidos-publications.com/601/downloadSupplementary)
Supplement: Supplementary file 1 [file downloadSupplementary]

## Sheet: Sheet1
Table SVIII. Distribution of single cells in each single-cell subpopulations.
Group I	Group II			Group III
scRA0	scRA1	scRA2	scRA3	scRA4
180-1	30Gy-85	12Gy-16	30Gy-20	30Gy-47
180-24	12Gy-85	12Gy-64	12Gy-76	30Gy-33
180-20	12Gy-27	12Gy-25	30Gy-22	30Gy-63
180-12	12Gy-28	30Gy-50	30Gy-13	12Gy-8
280-9	30Gy-35	12Gy-10	30Gy-31	30Gy-72
180-14	30Gy-8	12Gy-50	30Gy-54	30Gy-41
180-5	12Gy-81	12Gy-29	30Gy-76	30Gy-11
180-33	30Gy-88	12Gy-49	30Gy-16	30Gy-6
180-32	12Gy-66	12Gy-11	30Gy-53	30Gy-12
180-29	12Gy-42	12Gy-44	30Gy-84	30Gy-26
180-35	30Gy-25	12Gy-45	30Gy-70	30Gy-38
180-27	12Gy-61	12Gy-7	30Gy-82	30Gy-77
180-37	12Gy-55	12Gy-70	30Gy-32	30Gy-43
180-15	12Gy-59	12Gy-74	30Gy-1	30Gy-17
180-34	30Gy-73	12Gy-47	30Gy-52	30Gy-51
180-16	12Gy-26	30Gy-21	30Gy-28	30Gy-55
180-41	12Gy-62	30Gy-69	30Gy-42	30Gy-9
180-23	12Gy-38	12Gy-9	12Gy-19
180-3	12Gy-43	12Gy-12	12Gy-48
180-31	30Gy-14	12Gy-78	12Gy-84
180-10	12Gy-75	12Gy-3	12Gy-36
180-28	12Gy-52	12Gy-46	30Gy-89
180-11	12Gy-37	12Gy-6	30Gy-7
180-30	12Gy-73	30Gy-4	30Gy-18
180-19	12Gy-65	12Gy-35	30Gy-49
180-38	12Gy-21	12Gy-87	30Gy-40
180-18	12Gy-5	12Gy-58	30Gy-71
180-2	12Gy-72	12Gy-60	30Gy-37
180-7	12Gy-51	30Gy-87	30Gy-34
180-8	12Gy-41	12Gy-57	30Gy-62
180-26	12Gy-77	30Gy-30	30Gy-67
180-13	12Gy-86	30Gy-3	30Gy-36
180-21	12Gy-69	30Gy-23	30Gy-66
180-40	12Gy-22	30Gy-48	30Gy-45
180-6	12Gy-67	30Gy-59	30Gy-24
180-17	12Gy-13	30Gy-83	30Gy-81
180-4	12Gy-14	30Gy-74	30Gy-61
180-22	12Gy-39	30Gy-80	30Gy-64
180-25	12Gy-20	30Gy-56	30Gy-60
180-39	30Gy-79	30Gy-65	30Gy-58
180-26	30Gy-29	12Gy-15	30Gy-2
	12Gy-71	12Gy-82	30Gy-75
	12Gy-17	12Gy-31	30Gy-39
	12Gy-2	12Gy-4	30Gy-27
	12Gy-33	12Gy-34	12Gy-83
	12Gy-56	12Gy-18	30Gy-19
	12Gy-30	12Gy-1	30Gy-5
	12Gy-68	12Gy-40	30Gy-10
		12Gy-54	30Gy-78
			30Gy-86
			30Gy-46
			30Gy-15
			12Gy-32
			12Gy-80
			12Gy-24
			30Gy-57
			30Gy-68
			30Gy-44
			12Gy-79
			12Gy-53
			12Gy-23
			12Gy-63
